# Supplementary material
Source: PubMed Central journal article supplement (PMC11002757)
Supplement: NIHMS1981248-supplement-Figure_S2.pdf [file NIHMS1981248-supplement-Figure_S2.pdf]

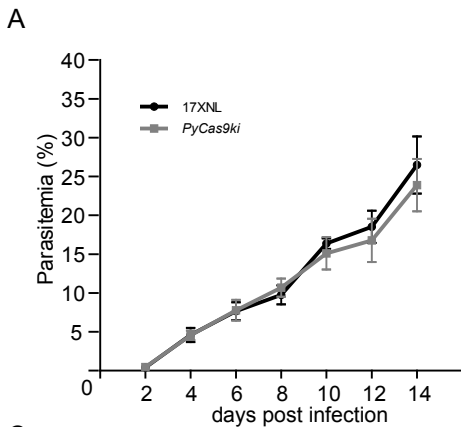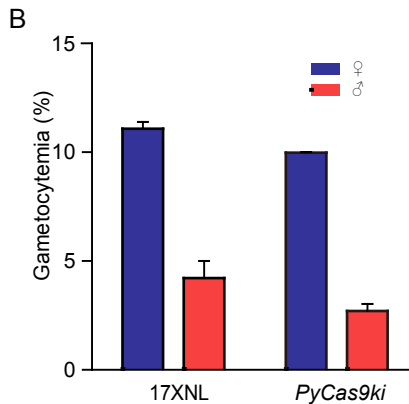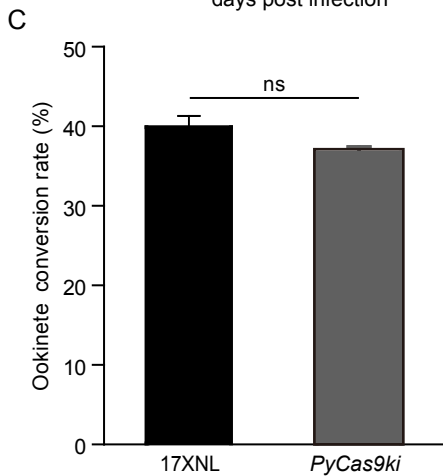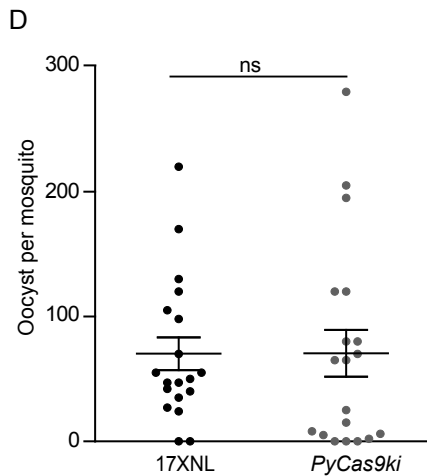

**E**

| Parasite line | Number of mosquito dissected | Salivary gland sporozoites per mosquito | Transmission to naive mice | Prepatent days |
|---------------|------------------------------|-----------------------------------------|----------------------------|----------------|
| 17XNL         | 15                           | 5600 ± 653                              | 3/3                        | 3.33 ± 0.47    |
| PyCas9ki      | 15                           | 5600 ± 1451                             | 3/3                        | 3              |
