# Supplementary material
Source: PubMed Central journal article supplement (PMC11002757)

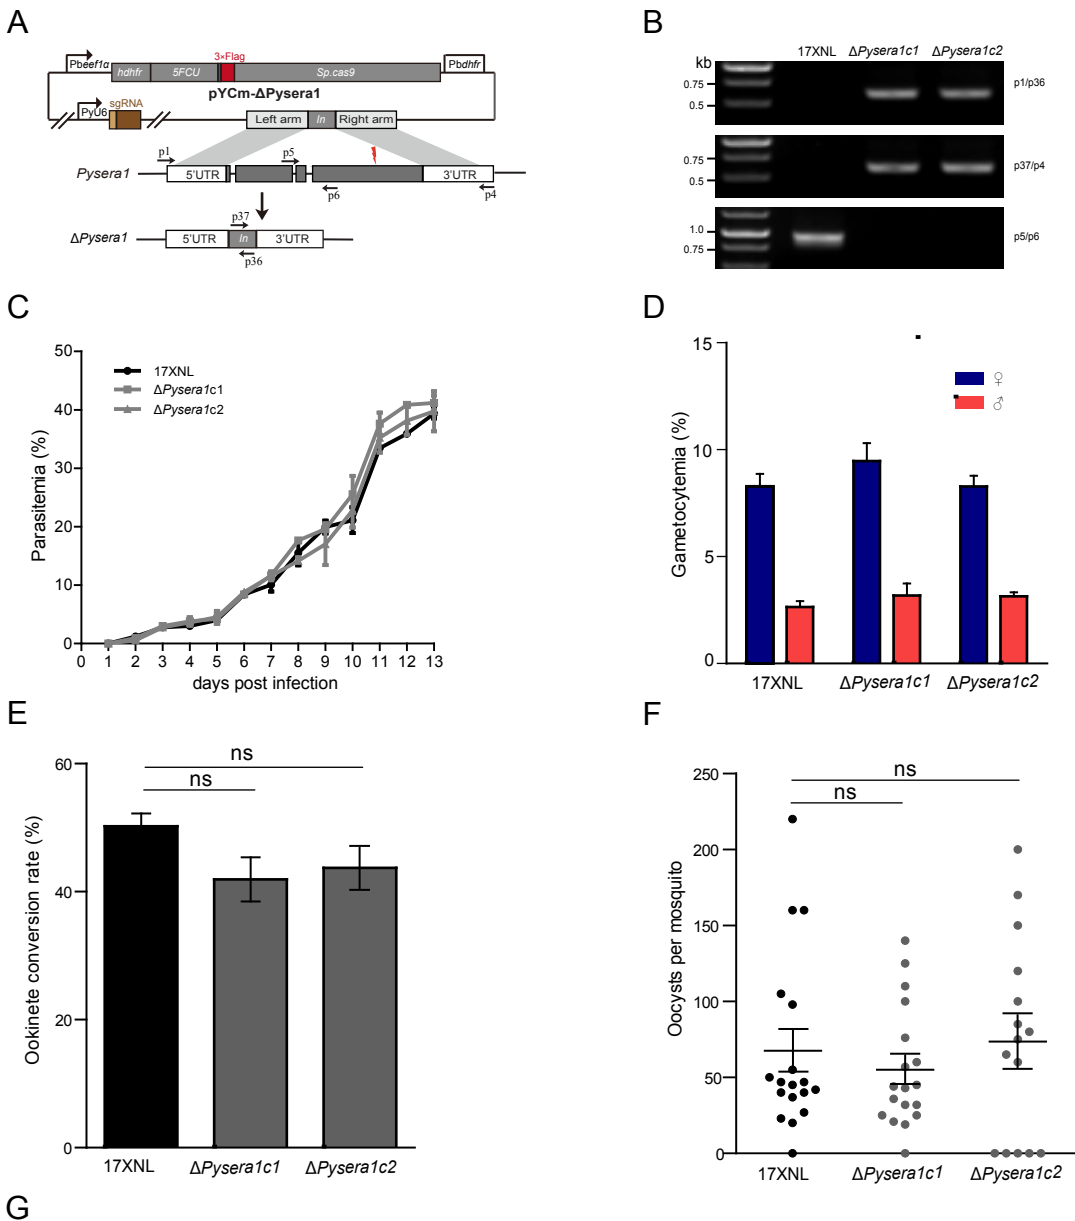

Supplement: NIHMS1981248-supplement-Figure_S1.pdf [file NIHMS1981248-supplement-Figure_S1.pdf]

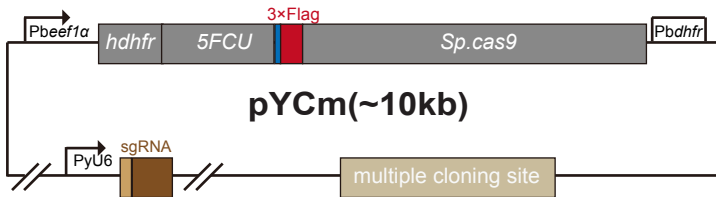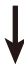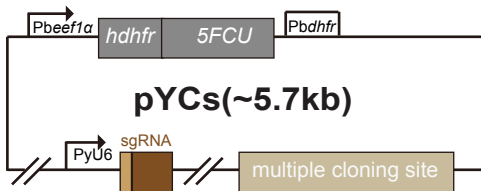

Supplement: NIHMS1981248-supplement-Figure_S3.pdf [file NIHMS1981248-supplement-Figure_S3.pdf]
